# Supplementary material
Source: MDPI journal article supplement (https://www.mdpi.com/2297-8739/8/11/195)
Supplement: s1 [file s1]

Supplementary Information

# On Process Intensification Through Membrane Storage Reactors

John Lowd III <sup>1</sup>, Theodore Tsotsis <sup>2</sup> and Vasilios I. Manousiouthakis <sup>1,\*</sup>

<sup>1</sup> Department of Chemical and Biomolecular Engineering, University of California at Los Angeles (UCLA), Los Angeles, CA 90095, USA; jlowd@ucla.edu

<sup>2</sup> Mork Family Department of Chemical Engineering & Materials Science, University of Southern California, Los Angeles, CA 90089, USA; tsotsis@usc.edu

\* Correspondence: vasilios@ucla.edu

Number of pages: 5

Number of figures: 6

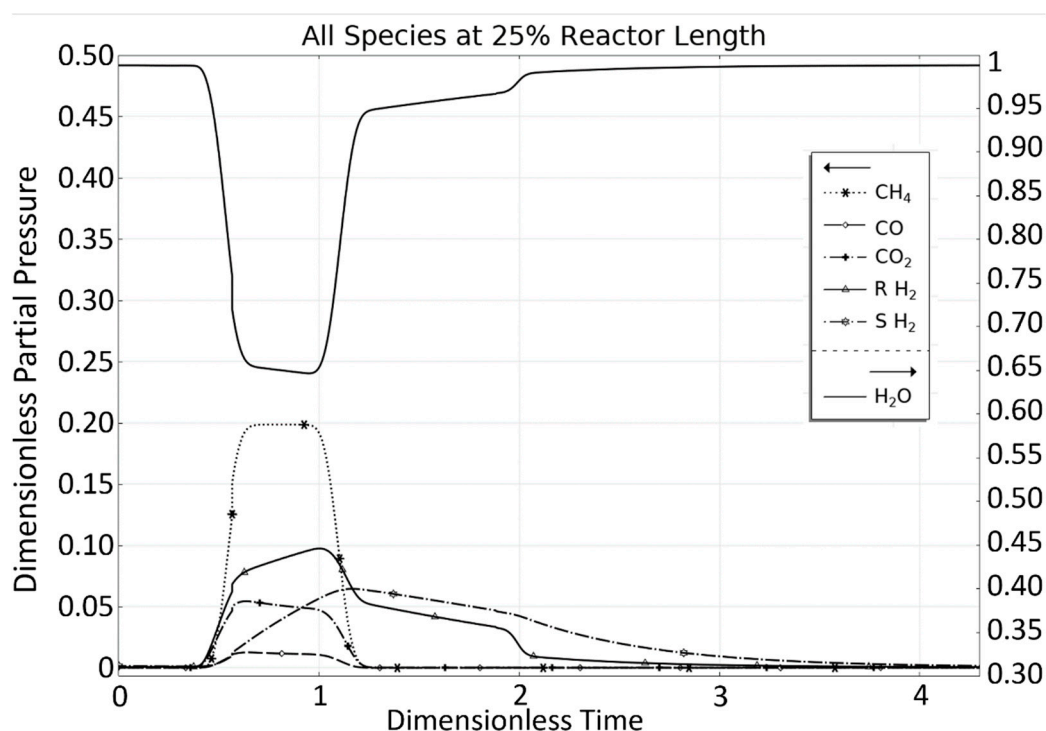

**Figure S1.** Dimensionless time evolution of species' partial pressure at 25% of reactor length for cycle 3 of  $Da=2$   $\Theta=10$ .

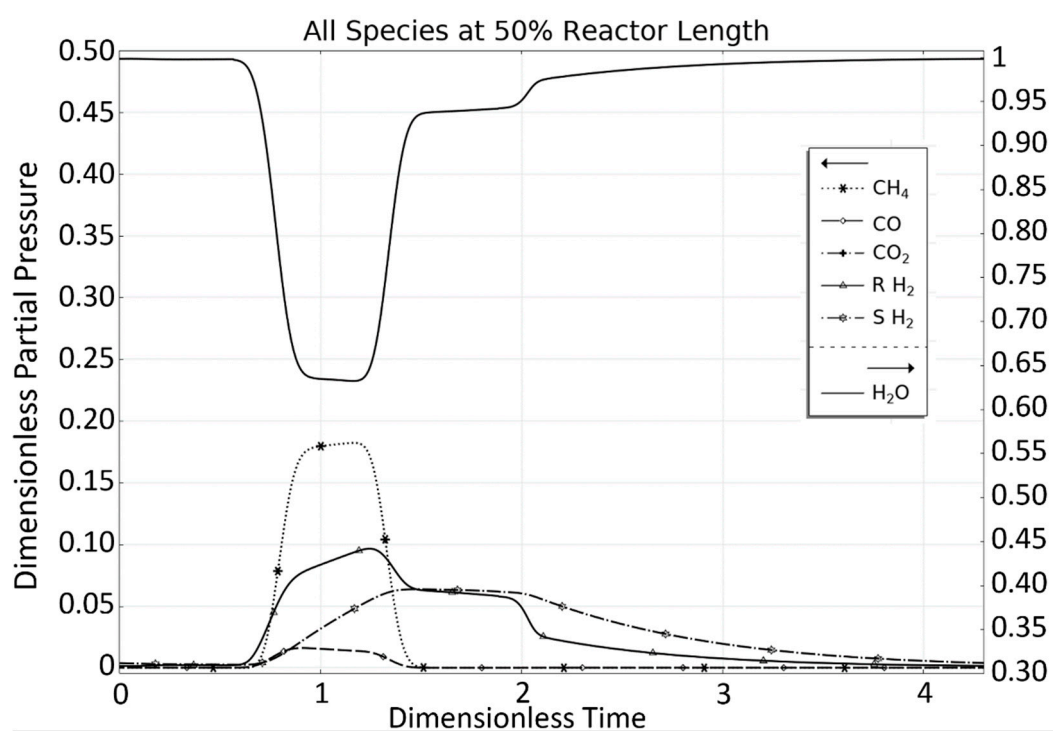

Figure S2. Dimensionless time evolution of species' partial pressure at 50% of reactor length for cycle 3 of  $Da=2$   $\Theta=10$ .

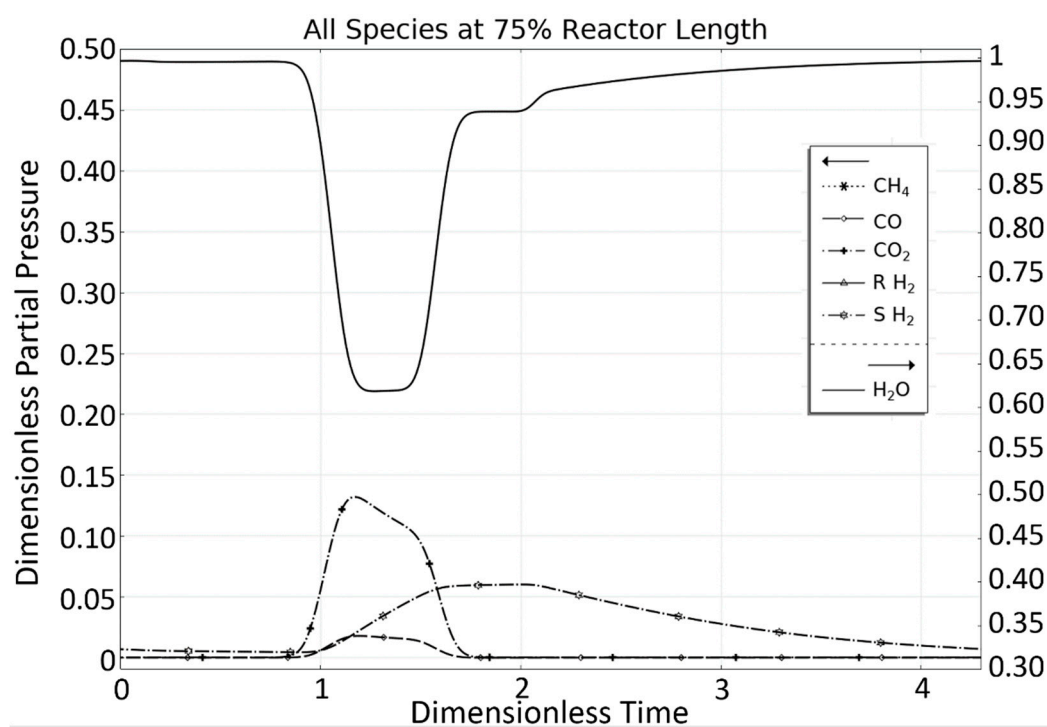

Figure S3. Dimensionless time evolution of species' partial pressure at 75% of reactor length for cycle 3  $Da=2$   $\Theta=10$ .

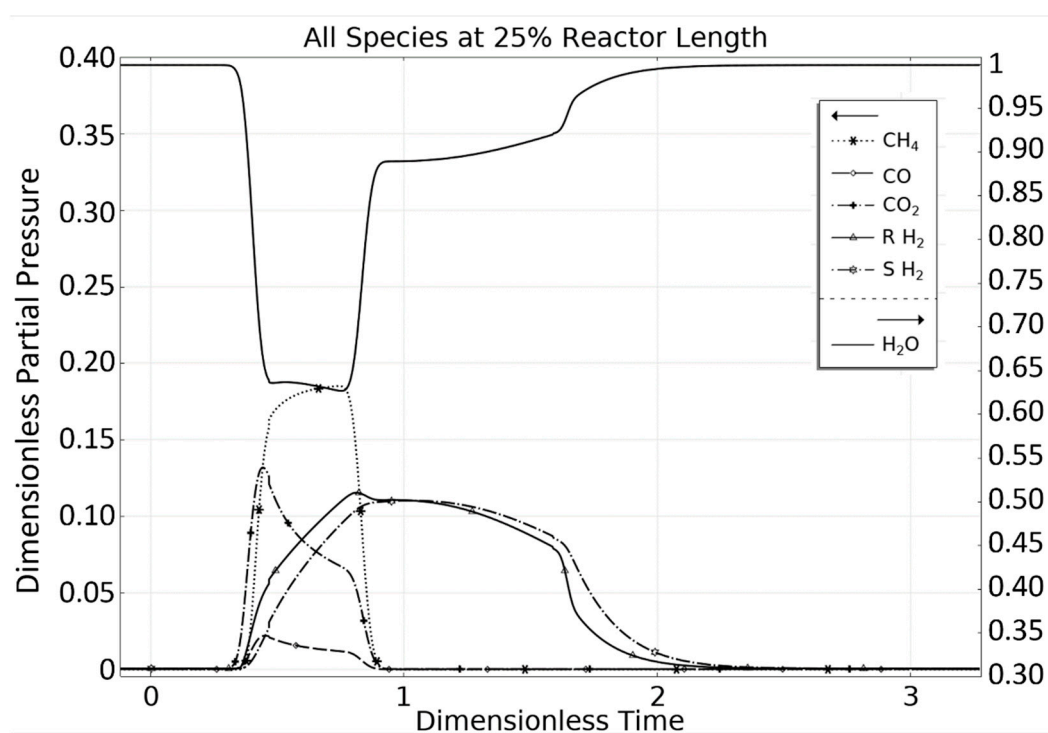

Figure S4. Dimensionless time evolution of species' partial pressure at 25% of reactor length for cycle 3 for  $Da=4$   $\Theta=50$ .

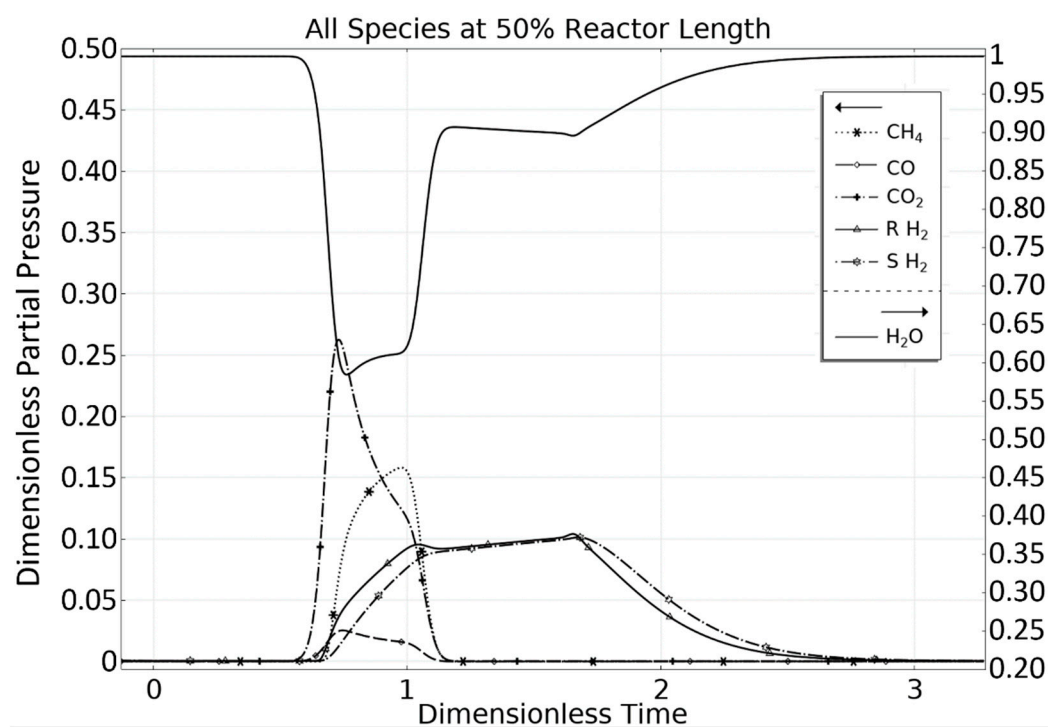

Figure S5. Dimensionless time evolution of species' partial pressure at 50% of reactor length for cycle 3 for  $Da=4$   $\Theta=50$ .

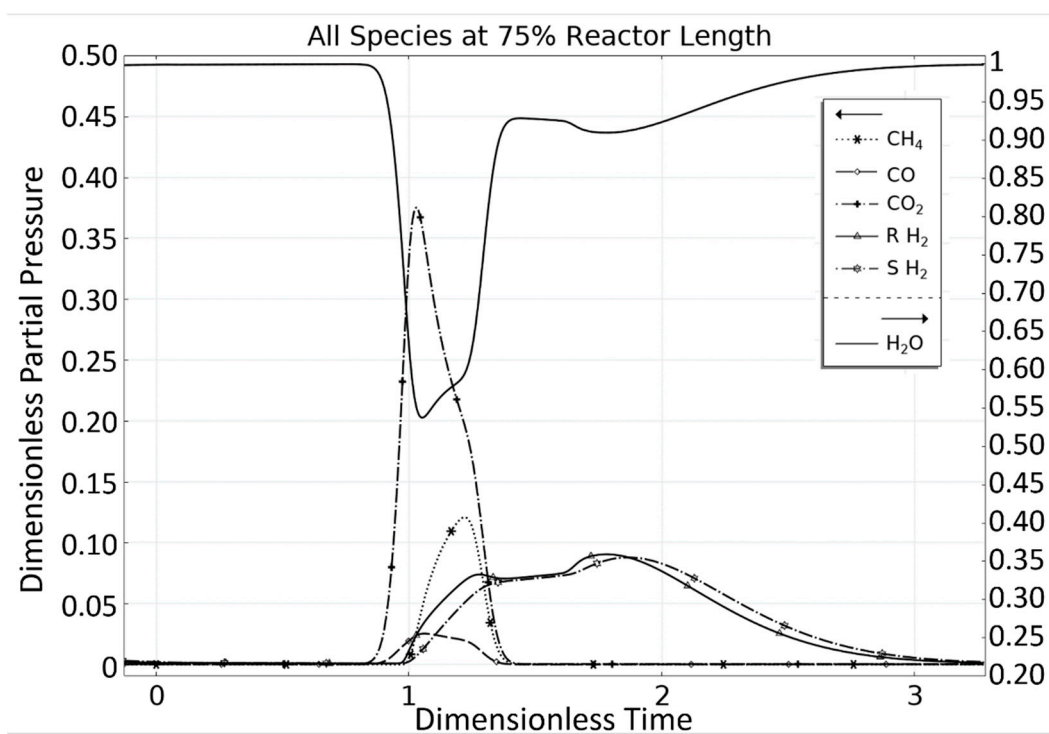

**Figure S6.** Dimensionless time evolution of species' partial pressure at 75% of reactor length for cycle 3 for  $Da=4$   $\Theta=50$ .
